# Supplementary material for: Fabrication of functionalized 3D graphene with controllable micro/meso-pores as a superior electrocatalyst for enhanced oxygen reduction in both acidic and alkaline solutions
Source: Royal Society of Chemistry journal article supplement (doi:10.1039/c6ra16530c), 2016-01-01
Supplement: c6ra16530c1.pdf [file c6ra16530c1.pdf]

## Electronic Supplementary Material

Fabricating of functionalized 3D graphene with controllable micro/mesopores as a superior electrocatalyst for enhanced oxygen reduction in both acidic and alkaline solutions

Yue Guan, Zhiyu Dou, Yan Yang, Juanhong Xue, Zhen Zhu, Lili Cui\*

Key Laboratory of Applied Chemistry and Nanotechnology at Universities of Jilin Province, Department of Chemistry and Chemical Engineering, Changchun University of Science and Technology, Changchun 130022, China

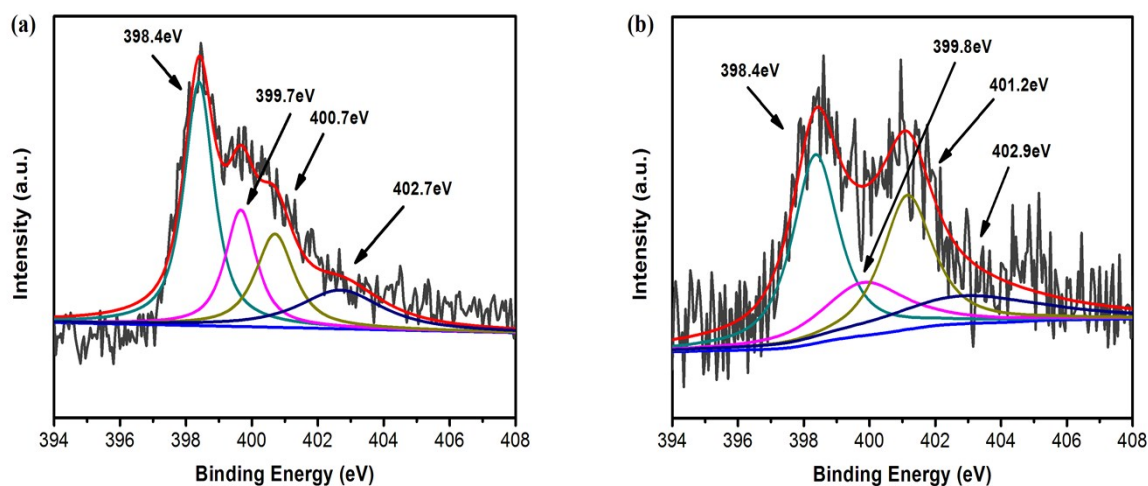

**Fig. S1** (a) High-resolution N 1s spectrum of the 3D Fe<sub>5</sub>C<sub>2</sub>/N-PG-1.0-700. (b) High-resolution N 1s spectrum of the 3D Fe<sub>5</sub>C<sub>2</sub>/N-PG-1.0-900.

---

Corresponding author:

\*E-mail: cuilili1127@gmail.com (Lili Cui)

**Table S1** Surface element contents obtained from the XPS analysis.

| samples                                            | C     | N    | O    | Fe   | N at%     |          |           |          |
|----------------------------------------------------|-------|------|------|------|-----------|----------|-----------|----------|
|                                                    | 1s    | 1s   | 1s   | 2p   | Pyridinic | Pyrrolic | Graphitic | Oxidized |
|                                                    | %     | %    | %    | %    | N         | N        | N         | N        |
| <b>3D Fe<sub>5</sub>C<sub>2</sub>/N-PG-1.0-700</b> | 90.75 | 5.39 | 3.57 | 0.29 | 2.21      | 1.11     | 1.09      | 0.97     |
| <b>3D Fe<sub>5</sub>C<sub>2</sub>/N-PG-1.0-800</b> | 94.16 | 2.82 | 2.78 | 0.24 | 0.96      | 0.66     | 0.78      | 0.42     |
| <b>3D Fe<sub>5</sub>C<sub>2</sub>/N-PG-1.0-900</b> | 95.42 | 1.72 | 2.73 | 0.13 | 0.61      | 0.32     | 0.48      | 0.31     |

**Table S2** Electrochemical performance of different electrocatalysts for ORR.

| Materials                                       | $E_{\text{onest}}$<br>(V) | $E_{1/2}$<br>(V) | $J_L$<br>(mA cm <sup>-2</sup> ) | Electrolyte<br>solution              | Reference<br>electrode | Rreference   |
|-------------------------------------------------|---------------------------|------------------|---------------------------------|--------------------------------------|------------------------|--------------|
| 3D Fe <sub>5</sub> C <sub>2</sub> /N-PG-1.0-800 | 0.88                      | 0.71             | 6.62                            | 0.5 M H <sub>2</sub> SO <sub>4</sub> | RHE                    | In this work |
| Fe-N-CC                                         | 0.80                      | 0.52             | 3.50                            | 0.5 M H <sub>2</sub> SO <sub>4</sub> | RHE                    | 1            |
| PANI-Fe                                         | 0.85                      | --               | 4.50                            | 0.5 M H <sub>2</sub> SO <sub>4</sub> | RHE                    | 2            |
| Co-N-GA                                         | 0.88                      | 0.73             | 5.90                            | 0.5 M H <sub>2</sub> SO <sub>4</sub> | RHE                    | 3            |
| ZIF-67-900                                      | 0.85                      | 0.71             | 3.90                            | 0.5 M H <sub>2</sub> SO <sub>4</sub> | RHE                    | 4            |
| Fe-N-HCMS                                       | 0.80                      | --               | 6.30                            | 0.5 M H <sub>2</sub> SO <sub>4</sub> | RHE                    | 5            |

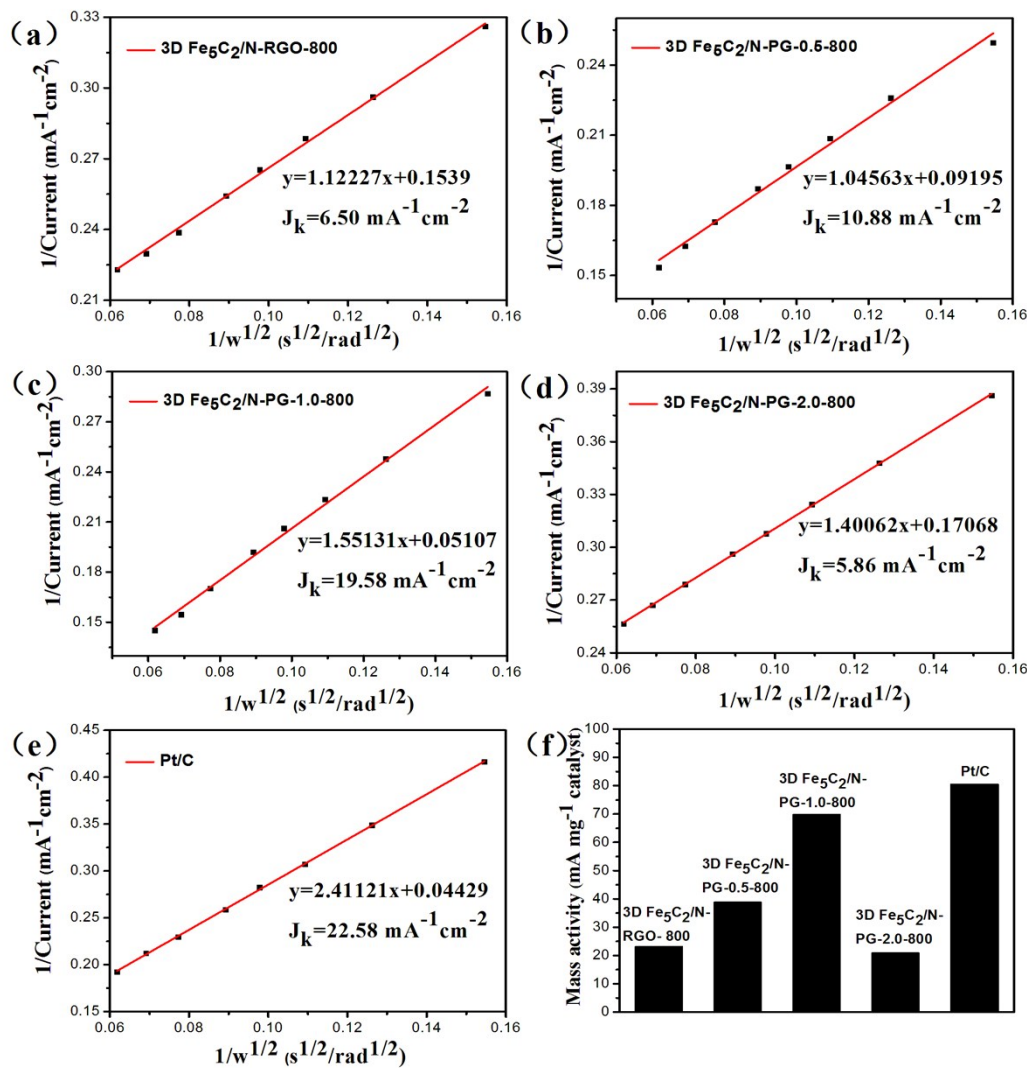

**Fig. S2** The K-L plots and the corresponding kinetic current density of 3D Fe<sub>5</sub>C<sub>2</sub>/N-RGO-800 (a), 3D Fe<sub>5</sub>C<sub>2</sub>/N-PG-0.5-800 (b), 3D Fe<sub>5</sub>C<sub>2</sub>/N-PG-1.0-800 (c), 3D Fe<sub>5</sub>C<sub>2</sub>/N-PG-2.0-800 (d) and Pt/C (e) sample at 0.6 V vs. RHE in O<sub>2</sub>-saturated 0.5 M H<sub>2</sub>SO<sub>4</sub> solution at 1600 rpm, respectively. (f) Mass activity of 3D Fe<sub>5</sub>C<sub>2</sub>/N-RGO-800, 3D Fe<sub>5</sub>C<sub>2</sub>/N-PG-h-800 and Pt/C samples at 0.6 V vs. RHE in O<sub>2</sub>-saturated 0.5 M H<sub>2</sub>SO<sub>4</sub> solution at 1600 rpm. The catalyst loading in all cases is 280 μg cm<sup>-2</sup>.

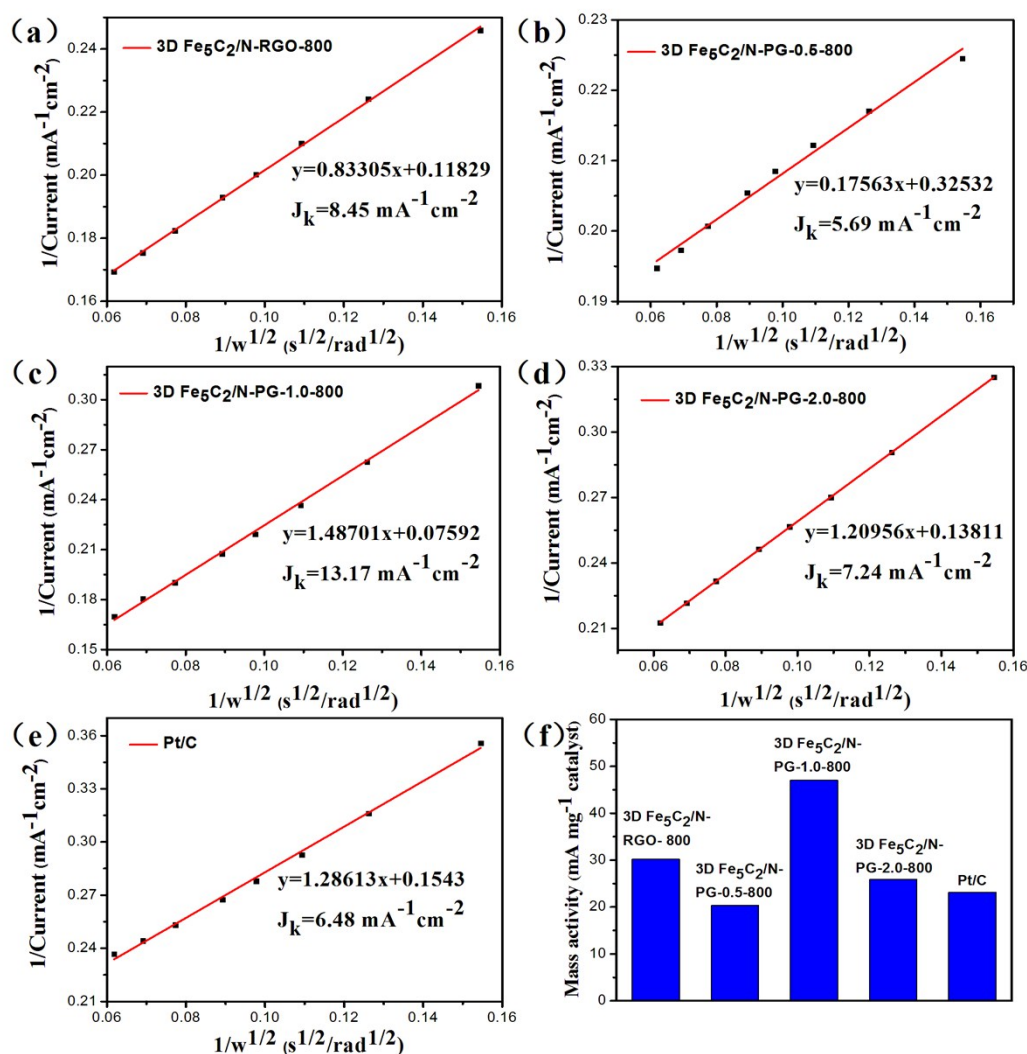

**Fig. S3** The K-L plots and the corresponding kinetic current density of 3D Fe<sub>5</sub>C<sub>2</sub>/N-RGO-800 (a), 3D Fe<sub>5</sub>C<sub>2</sub>/N-PG-0.5-800 (b), 3D Fe<sub>5</sub>C<sub>2</sub>/N-PG-1.0-800 (c), 3D Fe<sub>5</sub>C<sub>2</sub>/N-PG-2.0-800 (d) and Pt/C (e) at 0.8 V vs. RHE in O<sub>2</sub>-saturated 0.1 M KOH solution at 1600 rpm, respectively. (f) Mass activity of 3D Fe<sub>5</sub>C<sub>2</sub>/N-RGO-800, 3D Fe<sub>5</sub>C<sub>2</sub>/N-PG-h-800 and Pt/C samples at 0.8 V vs. RHE in O<sub>2</sub>-saturated 0.1 M KOH solution at 1600 rpm. The catalyst loading in all cases is 280 μg cm<sup>-2</sup>.

## References

- 1 G. A. Ferrero, K. Preuss, A. Marinovic, A. B. Jorge, N. Mansor, D. J. L. Brett, A. B. Fuertes, M. Sevilla and M. M. Titirici, *ACS Nano*, 2016, DOI:10.1021/acsnano.6b01247.
- 2 H. W. Liang, W. Wei, Z. S. Wu, X. Feng and K. Müllen, *J. Am. Chem. Soc.* 2013, **135**, 16002-16005.
- 3 X. G. Fu, J. Y. Choi, P. Y. Zamani, G. P. Jiang, M. A. Hoque, F. M. Hassan and Z. W. Chen, *ACS Appl. Mater. Interfaces*, 2016, **8**, 6488–6495.
- 4 X. J. Wang, J. W. Zhou, H. Fu, W. Li, X. X. Fan, G. B. Xin, J. Zheng and X. G. Li, *J. Mater. Chem. A*, 2014, **2**, 14064-14070.
- 5 M. Zhou, C. Yang and K. -Y. Chan, *Adv Energy Mater*, 2014, **4**, n/a-n/a.
